# Nicotine Deteriorates the Osteogenic Differentiation of Periodontal Ligament Stem Cells through $\alpha 7$ Nicotinic Acetylcholine Receptor Regulating wnt Pathway

Zhifei Zhou<sup>1,2,3</sup>, Bei Li<sup>2,3,3</sup>, Zhiwei Dong<sup>4</sup>, Fen Liu<sup>1,5</sup>, Yu Zhang<sup>1,2</sup>, Yang Yu<sup>2</sup>, Fengqing Shang<sup>2,6</sup>, Lizheng Wu<sup>1</sup>, Xiaojing Wang<sup>1\*</sup>, Yan Jin<sup>2,3\*</sup>

**1** Department of Pediatric Dentistry, School of Stomatology, Fourth Military Medical University, Xi'an, Shaanxi, China, **2** Research and Development Center for Tissue Engineering, Fourth Military Medical University, Xi'an, Shaanxi, China, **3** Department of Oral Histology and Pathology, School of Stomatology, Fourth Military Medical University, Xi'an, Shaanxi, China, **4** Department of Oral and Maxillofacial Surgery, General Hospital of Shenyang Military Area Command, Shenyang, Liaoning, China, **5** Department of Oral Medicine, Maternal and Child Care Hospital, Xi'an, Shaanxi, China, **6** Department of Orthodontic, School of Stomatology, Fourth Military Medical University, Xi'an, Shaanxi, China

## Abstract

**Aims:** Cigarette smoking is one of the high risk factors of adult chronic periodontitis and nicotine is the well established toxic substance in cigarette. However, the mechanism of nicotine induced periodontitis is still unknown. Here we studied whether nicotine impaired the osteogenic differentiation of human periodontal ligament stem cells (hPDLSCs) through activating  $\alpha 7$  nicotinic acetylcholine receptor ( $\alpha 7$  nAChR).

**Methods:** hPDLSCs with multi differentiation potential and surface makers for mesenchymal stem cells were harvested by limiting dilution technique. The level of mineralized nodule formation was assessed by alizarin red S staining. Expression level of osteogenic related genes and proteins were detected by real-time PCR and western blot analysis. The expression of  $\alpha 7$  nAChR and its downstream signaling pathway were examined by western blot. The role of the receptor and related signaling pathway in nicotine impairing the osteogenic potential of hPDLSCs were also studied in different levels.

**Results:** Nicotine deteriorated the osteogenic differentiation of hPDLSCs in a dose dependent manner. Activation of  $\alpha 7$  nAChR by nicotine treatment activated wnt/ $\beta$ -catenin signaling pathway, leading to osteogenic deficiency of hPDLSCs. Blockage of  $\alpha 7$  nAChR and wnt pathway inhibitor treatment rescued nicotine induced osteogenic differentiation deficiency.

**Conclusions:** These data suggested that nicotine activated  $\alpha 7$  nAChR expressed on PDLSCs and further activated wnt signaling downstream, thus deteriorating the osteogenic potential of PDLSCs. The impairment of osteogenic differentiation of PDLSCs by nicotine might lead to cigarette smoking related periodontitis.

**Citation:** Zhou Z, Li B, Dong Z, Liu F, Zhang Y, et al. (2013) Nicotine Deteriorates the Osteogenic Differentiation of Periodontal Ligament Stem Cells through  $\alpha 7$  Nicotinic Acetylcholine Receptor Regulating wnt Pathway. PLoS ONE 8(12): e83102. doi:10.1371/journal.pone.0083102

**Editor:** Andre van Wijnen, University of Massachusetts Medical, United States of America

**Received:** August 2, 2013; **Accepted:** October 30, 2013; **Published:** December 20, 2013

**Copyright:** © 2013 Zhou et al. This is an open-access article distributed under the terms of the Creative Commons Attribution License, which permits unrestricted use, distribution, and reproduction in any medium, provided the original author and source are credited.

**Funding:** This study was supported by grants from the National Major Scientific Research Program of China <http://program.most.gov.cn/> (2010CB944800 and 2011CB964700) and the Natural Science Foundation of China <http://www.nsf.gov.cn/Portal0/default152.htm> (81170964, 31030033 and 81020108019). The funders had no role in study design, data collection and analysis, decision to publish, or preparation of the manuscript.

**Competing Interests:** The authors have declared that no competing interests exist.

\* E-mail: yanjin@fmmu.edu.cn (YJ); wxjingpd@hotmail.com (XW)

These authors contributed equally to this work.

## Introduction

Periodontitis is a chronic disease which results in the loss of periodontal tissues in clinical symptoms of periodontal attachment loss, forming of periodontal pocket, osteopenia for alveolar bone and finally teeth exfoliation [1]. Periodontal ligament stem cells (PDLSCs), a newly recognized subpopulation of mesenchymal stem cells (MSCs), have been isolated from periodontal ligament tissues and are capable of regenerating cementum/periodontal ligament tissues *in vivo* [2]. Further studies confirmed that the complex formed by hPDLSCs was similar to natural periodontal tissues in considering histological morphology and spatial arrangement [3]. All these results indicated that PDLSCs had

the characteristic of differentiating into osteoblast like cells which was critical to the regeneration of periodontal tissues.

Cigarette smoking has been recognized as a high risk factor for periodontitis [4]. Not only could it lead to a high prevalence of periodontal diseases, but also smoking would deteriorate the prognosis of periodontitis even if comprehensive treatments were received [5]. Potential mechanisms for this phenomenon could be considered as that nicotine could stimulate periodontal ligament cells to express inflammatory factors such as IL-8 thus destructing the stable status of periodontal tissues [6] and the balance of immunoregulation in local microenvironment [7]. In addition, it is recognized that besides bone absorption, nicotine also down regulated the volume of newly formed alveolar bone tissues [8].

Our previous research suggested that  $\alpha 7$  nicotinic acetylcholine receptor ( $\alpha 7$  nAChR), which was an important receptor for nicotine, expressed in periodontal tissues in rats and human beings [9] after study confirmed that nAChR expressed in non neuron tissues [10]. We also found that the adverse effects of nicotine on periodontal tissues could be antagonized by  $\alpha$ -Bungarotoxin ( $\alpha$ -BTX), a specific antagonist of  $\alpha 7$  nAChR. Thus the signaling pathway of  $\alpha 7$  nAChR might be one of the potential mechanisms for impaired bone formation of nicotine related periodontitis.

However, the mechanism of smoking related periodontitis is still unclear. Previous study has reported that nicotine up regulated wnt signaling pathway in human alveolar interstitial fibroblast [11]. And our previous results have already demonstrated that the activation of wnt signaling pathway suppressed the osteogenic potential of PDLSCs under both normal and inflammatory circumstances [12–14].

Thus hypotheses were made that the specific receptor of nicotine  $\alpha 7$  nAChR expressed in human periodontal ligament stem cells through which nicotine affected wnt signaling pathway downstream and further regulated the osteogenic capacity of PDLSCs. We reported that nicotine deteriorated osteogenic differentiation of hPDLSCs in a dose dependent manner. The impairment of osteogenic differentiation of hPDLSCs was mediated through activated  $\alpha 7$  nAChR and downstream wnt/ $\beta$ -catenin pathway.

## Materials and Methods

### Study Subjects and Ethics Statement

Normal healthy premolars and third molars ( $n=14$ ) were obtained from 8 patients at the age of 12 to 23 years old who needed to extract the teeth because of orthodontic purposes and 9 teeth of them were used for further experiment. All the subjects were from School of Stomatology, Fourth Military Medical University and were free from any recent clinical acute or chronic infections. Before the investigation, the participants and guardians on behalf of them were informed of the objectives of this study. Written consents were obtained from them prior to conducting the study. Ethical approval had been obtained from the Ethics Committee of School of Stomatology, Fourth Military Medical University.

### Cell Culture

PDLSCs were isolated and cultured as we previously described [15–18]. All the teeth were washed by sterile phosphate buffer solution (PBS) and then periodontal tissues from the middle third of the roots were gently scratched and cut into small pieces ( $1\text{ mm}^3$ ). Gingival or dental pulp tissues were excluded. Scratched tissues were digested with Type I Collagenase (Sigma, Santa Clara, CA, USA) for 15 minutes, then re-suspended in Alpha Minimum Essential Medium ( $\alpha$ -MEM, Hyclone, Logan, Utah, USA) which containing 10% (v/v) fetal bovine serum (FBS, Hyclone, Logan, Utah, USA), 0.292 mg/mL glutamine (Invitrogen, Carlsbad, CA, USA), 100 U/mL penicillin (Invitrogen, Carlsbad, CA, USA) and 100 mg/mL streptomycin (Invitrogen, Carlsbad, CA, USA). Periodontal ligament tissues were planted in 6-well plate at  $37^\circ\text{C}$  in a humidified atmosphere of 95% air and 5%  $\text{CO}_2$ . Medium was changed every 3 days. When cells surrounding the explants reached confluence, cell layers were harvested by 0.25% pancreatin ( $\text{pH}=8.0\text{--}9.0$ , Sigma, Santa Clara, CA, USA) taking the technique of limiting dilution to pick up monoplast colony for further culturing of hPDLSCs *in vitro*. Single-cell derived colonies were used in this study after 2–4

passages. For each experiment, PDLSCs in the same passage were used.

### Immunophenotype Analysis

PDLSCs were stained with antibodies for stem cell surface markers and analyzed by flow cytometry as described previously [19–21]. Briefly, To identify the phenotypes of hPDLSCs,  $5 \times 10^5$  cells at the 3<sup>rd</sup> passage were incubated with phycoerythrin (PE) conjugated monoclonal antibodies for human CD146 (Biolegend, San Diego, CA, USA), CD34 (Biolegend, San Diego, CA, USA), CD31 (eBioscience, San Diego, CA, USA) and fluorescein isothiocyanate (FITC) conjugated monoclonal antibodies for human stro-1 (Biolegend, San Diego, CA, USA), CD105 (eBioscience, San Diego, CA, USA), CD90 (eBioscience, San Diego, CA, USA), CD44 (Abcam, Cambridge, UK), CD14 (eBioscience, San Diego, CA, USA) as the manufacturer's instructions. The incubation procedure was carried out at  $4^\circ\text{C}$  away from light for 1 hour. After washing with PBS, cells were subjected to flow cytometric analysis (Beckman Coulter, Fullerton, CA, USA).

### Osteogenic/Adipogenic Differentiation of hPDLSCs

Osteogenic/Adipogenic differentiations of PDLSCs were performed according to previous publications [2,16,22]. Briefly,  $5 \times 10^4$  cells per well were seeded to 6-well plates and cultured in  $\alpha$ -MEM containing 10% FBS, 0.292 mg/mL glutamine, 100 U/mL penicillin, 100 mg/mL streptomycin. Osteogenic medium containing 100 nm dexamethasone (Sigma, Santa Clara, CA, USA), 50  $\mu\text{g/mL}$  ascorbic acid (Sigma, Santa Clara, CA, USA) and 5 mM  $\beta$ -glycerophosphate (Sigma, Santa Clara, CA, USA) or adipogenic medium containing 0.5 mM methylisobutylxanthine (Sigma, Santa Clara, CA, USA), 0.5 mM hydrocortisone (Sigma, Santa Clara, CA, USA), 60 mM indomethacin (Sigma, Santa Clara, CA, USA) was given when cells reached confluence and the conditioned medium was changed every 3 days. After 21 days of conditioned culturing, cells were fixed with 75% ethanol and stained with oil red O solution and 2% alizarin red (Sigma, Santa Clara, CA, USA) respectively. After washing with PBS, the cells were observed using an inverted microscope and imaged. The nodule area per well were measured quantitatively with an image analysis system Image-Pro Plus 5.0 software.

### WST-1 Cell Proliferation Assay

The toxic effect of nicotine (Sigma, Santa Clara, CA, USA) on hPDLSCs was detected with a modified MTT assay using WST-1 cell cytotoxicity assay kit (Roche Applied Science, Mannheim, Germany).  $5 \times 10^3$  cells per well were cultured in 96-well plates in 100  $\mu\text{L}$  medium. After 24 hours cells were administrated with nicotine at different concentrations. 10  $\mu\text{L}$  WST-1 was added to each well at the same time point everyday for 7 days and incubated for another 4 hours away from light in humidified atmosphere. After gentle vibrating for 1 minute, microtiter plate reader (Bio-Rad Model 680, Life Science Research, Tokyo, Japan) was used to measure the sample under wavelength of 450 nm with a 620 nm reference wavelength.

### Total RNA Extraction and Quantitative Real Time Polymerase Chain Reaction

Total RNA of hPDLSCs was isolated using Trizol reagent (Invitrogen, Carlsbad, CA, USA). Approximately 3  $\mu\text{g}$  total RNA of each experimental group was converted to cDNA with the Super Script First Strand Synthesis Kit (TaKaRa, Dalian, China). Real time polymerase chain reaction (PCR) system was prepared

**Table 1.** Primer sequences.

| Gene                | Primers                   |
|---------------------|---------------------------|
| h-ALP-F             | CCTGTAGCCAGGCCATTG        |
| h-ALP-R             | GGACCATTCCCACGTCTTAC      |
| h-Ocn-F             | CCCAGGCCTACCTGTATCAA      |
| h-Ocn-R             | GGTCAGCCAACCTCGTCACAGTC   |
| h-Runx2-F           | CACTGGCGCTGCAACAAGA       |
| h-Runx2-R           | CATTCGGAGCTCAGCAGAATAA    |
| h-BSP-F             | GGGCAGTAGTACTCATCCGA      |
| h-BSP-R             | TCTTCATTGTTTTCTCTTCATTG   |
| h- $\beta$ -actin-F | TGGCACCCAGCACAATGAA       |
| h- $\beta$ -actin-R | CTAAGTCATAGTCCGCCTAGAAGCA |

doi:10.1371/journal.pone.0083102.t001

using QuantiTect SYBR Green PCR kit (TaKaRa, Dalian, China) and applied Bio-systems CFX96™ Real-Time sequence detection system (Applied Biosystems, Darmstadt, Germany). Primers used in this study were listed in Table 1. For each detected gene, three independent experiments were carried out with different groups of hPDLSCs.

### Protein Isolation and Western Blot Analysis

Total protein was isolated from hPDLSCs using lysis in RIPA buffer (10 mM Tris-HCL, 1 mM EDTA, 1% sodium dodecyl sulfate, 1% Nonidet P-40, 1:100 proteinase inhibitor cocktail, 50 mM  $\beta$ -glycerophosphate, 50 mM sodium fluoride) on ice. The lysate was incubated for 20 minutes and then centrifuged at 12000 rpm for 15 minutes at 4°C. Protein quantification was performed by using a protein assay solution (Beyotime, Suzhou, China) to detect the absorbance at 595 nm wavelength. Aliquots of 40  $\mu$ g protein per sample was separated by 10% sodium dodecyl sulfate-polyacrylamide gel electrophoresis (SDS-PAGE) and then transferred onto a polyvinylidene fluoride (PVDF) membrane (Millipore, Temecula, CA, USA). The membrane was blocked in 5% (w/v) milk protein dissolved in PBS for 2 hours and then incubated with primary antibody overnight at 4°C. Subsequently, the sample was washed in Tween-TRIS buffered saline (TTBS, 10 mM TRIS-HCL, 50 mM NaCl, 0.25% Tween) and incubated with horseradish peroxidase-conjugated secondary antibody for 1 hour at room temperature. Immunodetection was performed using the Western-Light Chemiluminescent Detection System to detect the specific protein band on the membrane. Primary antibodies were purchased from the following commercial sources: antibodies against ALP, OCN and DKK1 were from Abcam, Cambridge, UK; antibodies against BSP, Runx2,  $\alpha$ 7 nAChR and p-GSK-3 $\beta$  were from Santa Cruz, Dallas, Texas, USA; antibodies against  $\beta$ -catenin and GSK-3 $\beta$  were from cell signaling, Danvers, MA, USA; antibodies against active- $\beta$ -catenin was from Millipore, Temecula, CA, USA.

### Nicotine, $\alpha$ -BTX and DKK1 Treatment

Nicotine at the concentrations of  $10^{-3}$ ,  $10^{-4}$ ,  $10^{-5}$ ,  $10^{-6}$ ,  $10^{-7}$  mol/L was administrated to the culturing medium of hPDLSCs when they were attached. The morphology of cells was observed and the proliferation of hPDLSCs was examined after 24 hours. In further study for osteogenic differentiation,  $5 \times 10^4$  cells/well were seeded to a 6-well plate and cultured in  $\alpha$ -MEM. When cells reached confluence, the conditioned osteogenic

medium was changed with nicotine at the concentrations of  $10^{-4}$ ,  $10^{-5}$ ,  $10^{-6}$  mol/L.  $10^{-8}$  mol/L  $\alpha$ -BTX (Toctis, Bristol, UK) or 10 ng/mL DKK1 (Pepro Tech, Suzhou, China) was added together with nicotine.

### Statistical Analysis

All experiments were performed in triplicate with three different groups of hPDLSCs. Each data was expressed in a mean  $\pm$  standard deviation (SD) form. The statistical differences between two groups were determined using two-tailed unpaired Student's t test while that for more than two groups one way Analysis of Variance (ANOVA) was used followed by turkey post-test. SPSS 13.0 software was utilized and p value less than 0.05 were considered as statistically significant.

## Results

### Nicotine Suppressed the Proliferation of hPDLSCs in a Dose Dependent Manner

First human PDLSCs which could form single cell colony (Fig. 1A) and express mesenchymal stem cell markers including CD44, CD90, CD105, CD146 and Stro-1; but were negative for hematopoietic cell marker CD34, monocytes maker CD14 and platelet endothelial cell maker CD31 (Fig. 1E) were isolated and characterized. Under the microscope hPDLSCs were grown in an adherent way with a long spindle shape and a radial arrangement (Fig. 1B). These cells showed osteogenic and adipogenic differentiation capacity after induction for 3 weeks *in vitro* (Fig. 1C, D). The results also showed no difference of osteogenic differentiation of PDLSC from 9 different donors (Figure S1).

After 24 hours seeded in a 6-well plate, hPDLSCs could be observed in long spindle morphology with clear cell nucleus (Figure 2A). However when  $10^{-3}$  mol/L nicotine was added into the  $\alpha$ -MEM medium in 24 hours, vacuolar degeneration could be observed (Figure 2B). Meanwhile when the concentration of nicotine was  $10^{-4}$  mol/L, increased granular substances could be clearly found in cell cytoplasm (Figure 2C). There is no significant difference in cell morphology comparing  $10^{-5}$ ,  $10^{-6}$ ,  $10^{-7}$  mol/L nicotine treatment groups to the control group (Figure 2D–F).

In addition, the proliferation of hPDLSCs was examined after treated by  $10^{-3}$ ,  $10^{-4}$ ,  $10^{-5}$ ,  $10^{-6}$ ,  $10^{-7}$  mol/L nicotine respectively. WST-1 cell proliferation assay showed that when  $10^{-3}$  mol/L nicotine was added into the medium, the proliferation rate of hPDLSCs decreased significantly compared to the control group (Fig. 2G).  $10^{-4}$  to  $10^{-6}$  mol/L nicotine treatment also decreased the proliferation of hPDLSCs while  $10^{-7}$  mol/L nicotine didn't affect the cell proliferation (Fig. 2G). Thus, nicotine suppressed the proliferation of hPDLSCs in a dose dependent manner.

### Nicotine Deteriorated the Osteogenic Differentiation Capacity of hPDLSCs

To identify the role of nicotine in regulating the osteogenic differentiation capability of hPDLSCs, different doses of nicotine were added to the osteogenic induction medium. Alizarin Red S staining showed that nicotine impaired osteogenic differentiation ability for hPDLSCs in a dose dependent manner while  $10^{-4}$  mol/L nicotine inhibited hPDLSCs to form mineralized nodules most significantly after 3 weeks' induction (Fig. 3A, B). In addition, hPDLSCs in different groups were also stained for qualitative ALP staining after 7 days of osteogenic induction; the results were identical with Alizarin Red S staining (Figure S2).

Also in the concentration of  $10^{-4}$  mol/L, nicotine could down regulate the expression of osteogenic related genes like ALP,



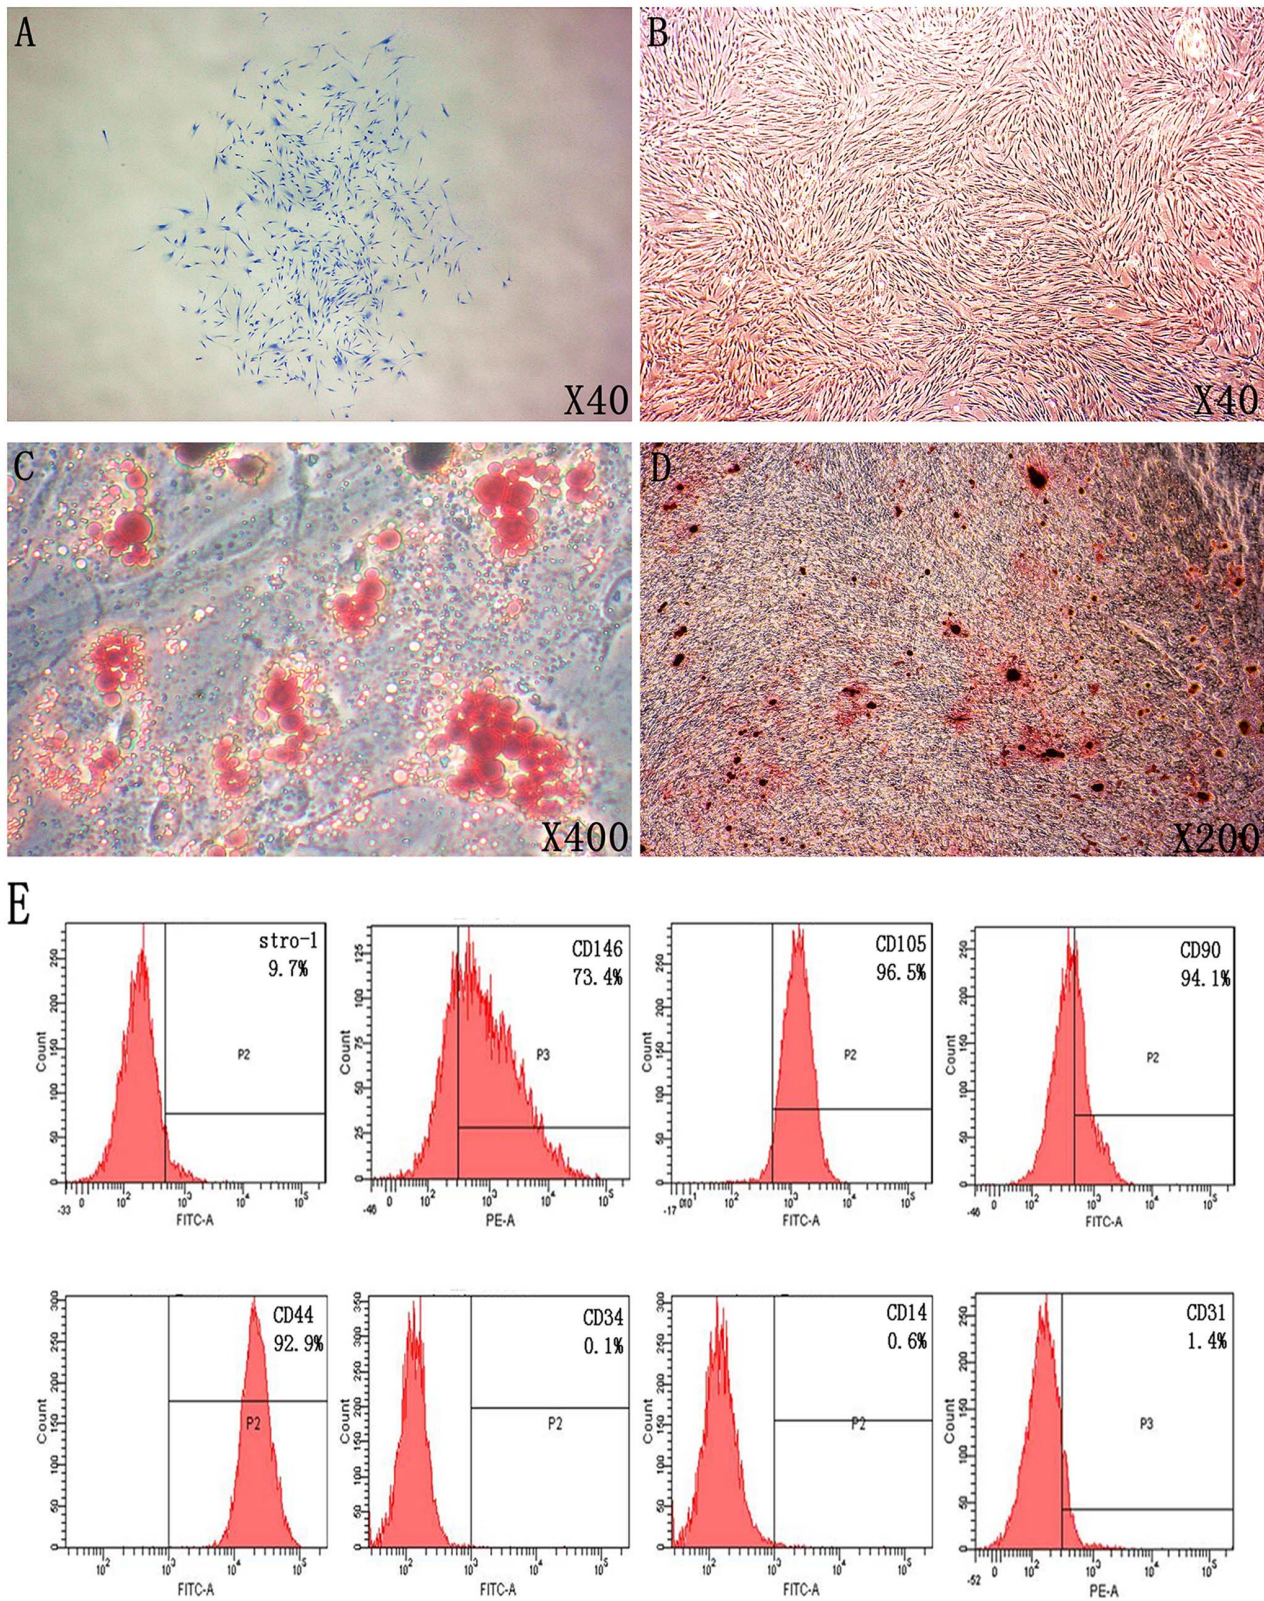

**Figure 1. Isolation and identification for human periodontal ligament stem cells.** **A:** Colonies derived from single cell in the method of limiting dilution was picked up for further culturing of hPDLSCs; **B:** hPDLSCs were grown in culture medium with a long spindle shape; **C:** Adipogenic differentiation of hPDLSCs was determined by Oil red O staining after 21 days of adipogenic induction; **D:** Osteogenic differentiation of hPDLSCs was determined by Alizarin red S staining after 21 days of osteogenic induction; **E:** Immunophenotype analysis of PDLSCs was determined by Flow cytometry assay.

doi:10.1371/journal.pone.0083102.g001



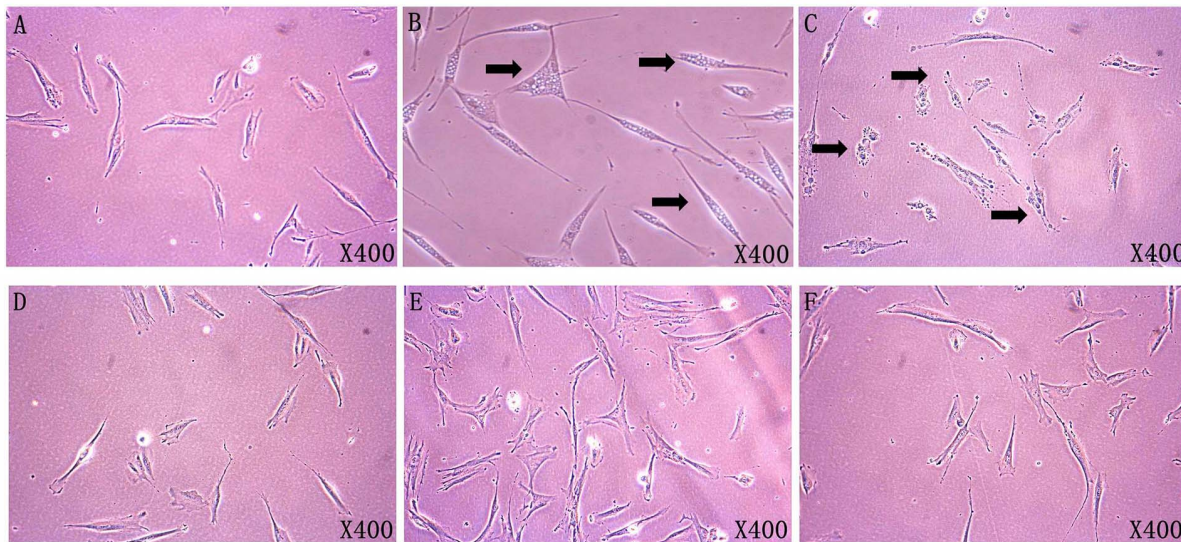

**Figure 2. Nicotine affects the morphology and suppresses the proliferation of hPDLSCs.** **A:** Morphology of PDLSC in control group; **B:** morphology of hPDLSC with stimulation of nicotine in  $10^{-3}$  mol/L, black arrow indicated the vacuolar degeneration of PDLSCs; **C–F:** Morphologies of hPDLSC with stimulation of nicotine from  $10^{-4}$ – $10^{-7}$  mol/L, increased granular substance in PDLSCs was indicated by black arrow; **G:** Proliferation of hPDLSCs from each group was determined by WST-1 assay. Nicotine with different concentrations suppresses the proliferation of hPDLSC. doi:10.1371/journal.pone.0083102.g002

OCN, BSP and Runx2 compared with the control group with a statistical significance ( $p < 0.05$ , Figure 3C). In the same concentration of nicotine, the protein expression of ALP, OCN, BSP and Runx2 during the osteogenic induction also decreased ( $P < 0.05$ , Figure 3D).

#### Nicotine Impaired Osteogenic Differentiation of hPDLSCs through the Activation of $\alpha 7$ nAChR

Our previous research indicated that  $\alpha 7$  nAChR expressed in human periodontal ligament fibroblasts and rat periodontal tissues [9]. Here we examined whether the deterioration of osteogenic differentiation of hPDLSCs by nicotine was through the activation of  $\alpha 7$  nAChR. Results indicated that  $\alpha 7$  nAChR expressed in hPDLSCs by qPCR and Western blot analysis (Figure 4A, B). Moreover, its expression was further strengthened with its agonist nicotine ( $10^{-4}$  mol/L) while the elevated expression was alleviated when given the specific antagonist of the receptor  $\alpha$ -BTX

( $10^{-8}$  mol/L) (Figure 4A, B). Meanwhile, there was no statistical significant difference when compared the control group for the expression of  $\alpha 7$  nAChR with the group of antagonist  $\alpha$ -BTX alone.

Osteogenic induction was carried out within the same groups. After 21 days of osteogenic induction, Alizarin Red S staining was performed and results showed that nicotine significantly inhibited the ability of hPDLSCs to form mineralized nodules while this down regulating effect could be partially reversed by  $\alpha$ -BTX.  $\alpha$ -BTX alone, however, did not up regulate the capability of hPDLSCs to form mineralized nodules (Figure 4C, D). After 7 days, the results of qualitative ALP staining also indicated that compared with the normal control, nicotine significantly inhibited the ability of hPDLSCs to form ALP in the early period of osteoblast while this down regulating effect could be antagonized by  $\alpha$ -BTX which was in accordance with the results of Alizarin Red S staining (Figure S2).

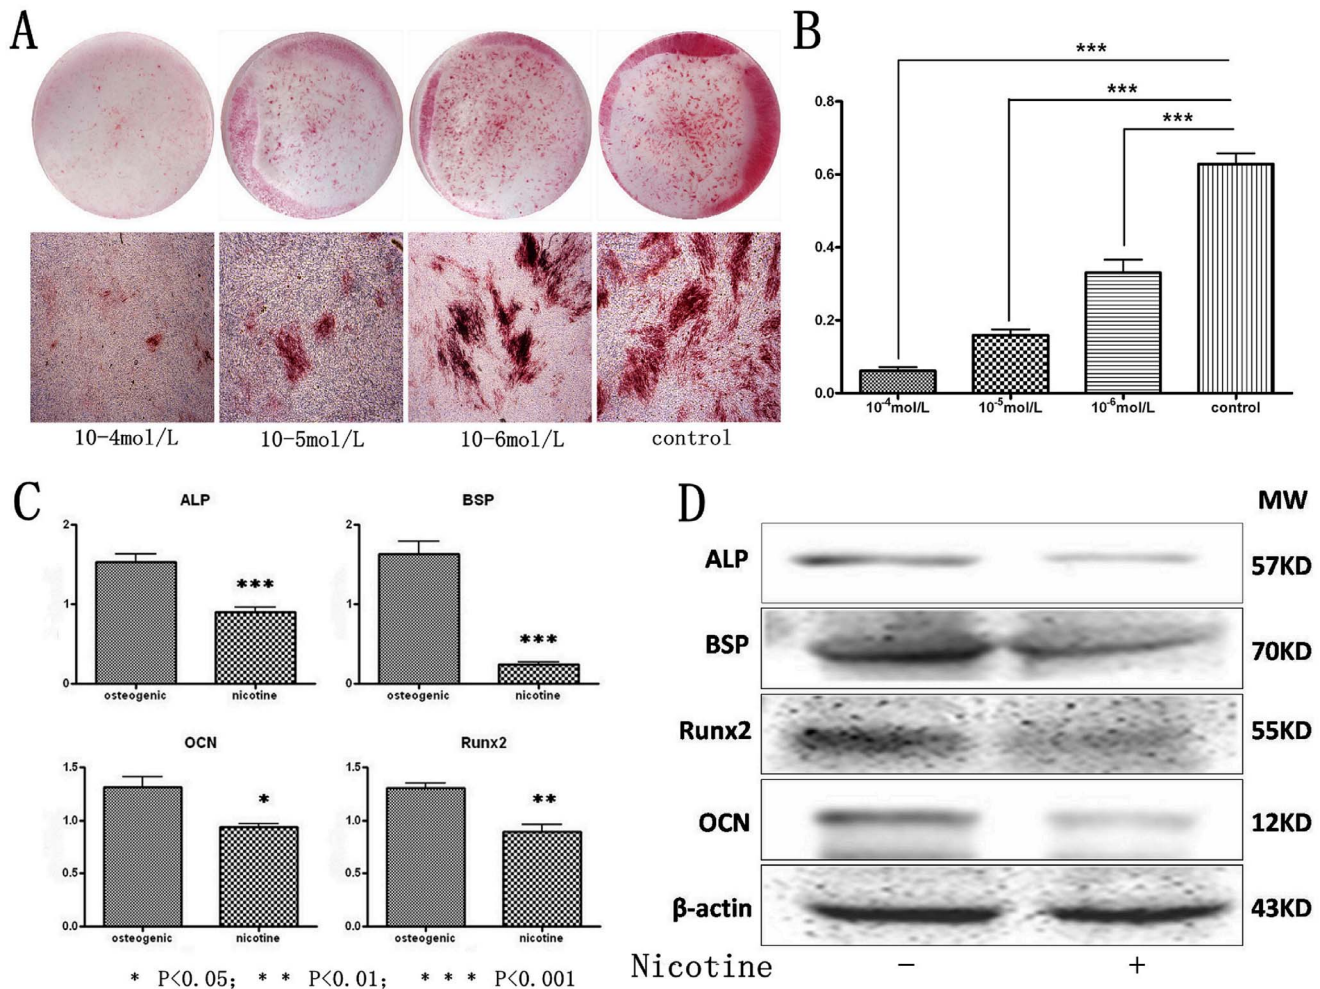

**Figure 3. Nicotine deteriorates the osteogenic differentiation capacity of hPDLSCs.** **A:** hPDLSCs treated by  $10^{-4}$ – $10^{-6}$  mol/L nicotine were cultured in osteogenic medium and osteogenic differentiation was determined by Alizarin red S staining after 21 days. Representative entire plate views of alizarin red staining in 6-well plates for PDLSCs from each group. **B:** The quantity result for Alizarin Red S staining; **C:** The expression of osteogenic related genes Runx2, BSP, ALP and OCN were determined by qRT-PCR after 14 days of culturing with osteogenic supplement. **D:** The expression of osteogenic related protein Runx2, BSP, ALP and OCN were determined by western blot after 14 days of culturing with osteogenic supplement. Data represent the means  $\pm$  SD. \* $p < 0.05$  ( $n = 3$ ). doi:10.1371/journal.pone.0083102.g003

Results of qPCR indicated the same results with histological staining (Figure 4E). Compared with normal control,  $10^{-4}$  mol/L nicotine significantly suppressed the gene expression in osteogenic differentiation such as ALP, OCN, BSP and Runx2. And if given  $\alpha$ -BTX ( $10^{-8}$  mol/L), the suppressive effect of nicotine was alleviated while  $\alpha$ -BTX alone could not up regulate these genes' expression in osteogenic induction. Results in the protein level were similar to qPCR between the same groups, protein expression of ALP, OCN, BSP and Runx2 showed the same tendency (Figure 4F).

#### Nicotine Deteriorated the Osteogenic Differentiation of hPDLSCs through $\alpha 7$ nAChR Regulating wnt/ $\beta$ -catenin Pathway

Our previous study indicated that the activation of wnt/ $\beta$ -catenin pathway suppressed osteogenic differentiation of hPDLSCs [12]. Thus we examined if wnt/ $\beta$ -catenin pathway was downstream regulated by  $\alpha 7$  nAChR in hPDLSCs. The protein expression of active- $\beta$ -catenin was increased under the

treatment of nicotine while the effect could be antagonized if co-treated with  $\alpha$ -BTX.  $\alpha$ -BTX alone didn't decrease the protein expression of active- $\beta$ -catenin in hPDLSCs (Figure 5A). In this study, the protein expression of total- $\beta$ -catenin had no statistical significant difference within the four groups (Figure 5A). The expression of dkk1, which was a suppressive protein of wnt signaling pathway, decreased after treatment of nicotine compared with normal control. While this suppressive effect was reversed when co-treated by  $\alpha$ -BTX (Figure 5A). In cytoplasm,  $\beta$ -catenin was continually degraded by a series complexes including GSK-3 $\beta$ , so that the wnt signaling pathway remained inactivated [23]. As the protein expression results indicated, GSK-3 $\beta$  which was included in degradation complexes was down regulated by treatment of nicotine while  $\alpha$ -BTX reversed this effect. However  $\alpha$ -BTX alone didn't enhance the protein expression of GSK-3 $\beta$  (Figure 5A). Results of western blot also showed that the expression of phosphorylated-GSK-3 $\beta$  in hPDLSCs was increased after treatment of nicotine while  $\alpha$ -BTX co-treatment decreased the expression of phosphorylated-GSK-3 $\beta$  (Figure 5A).



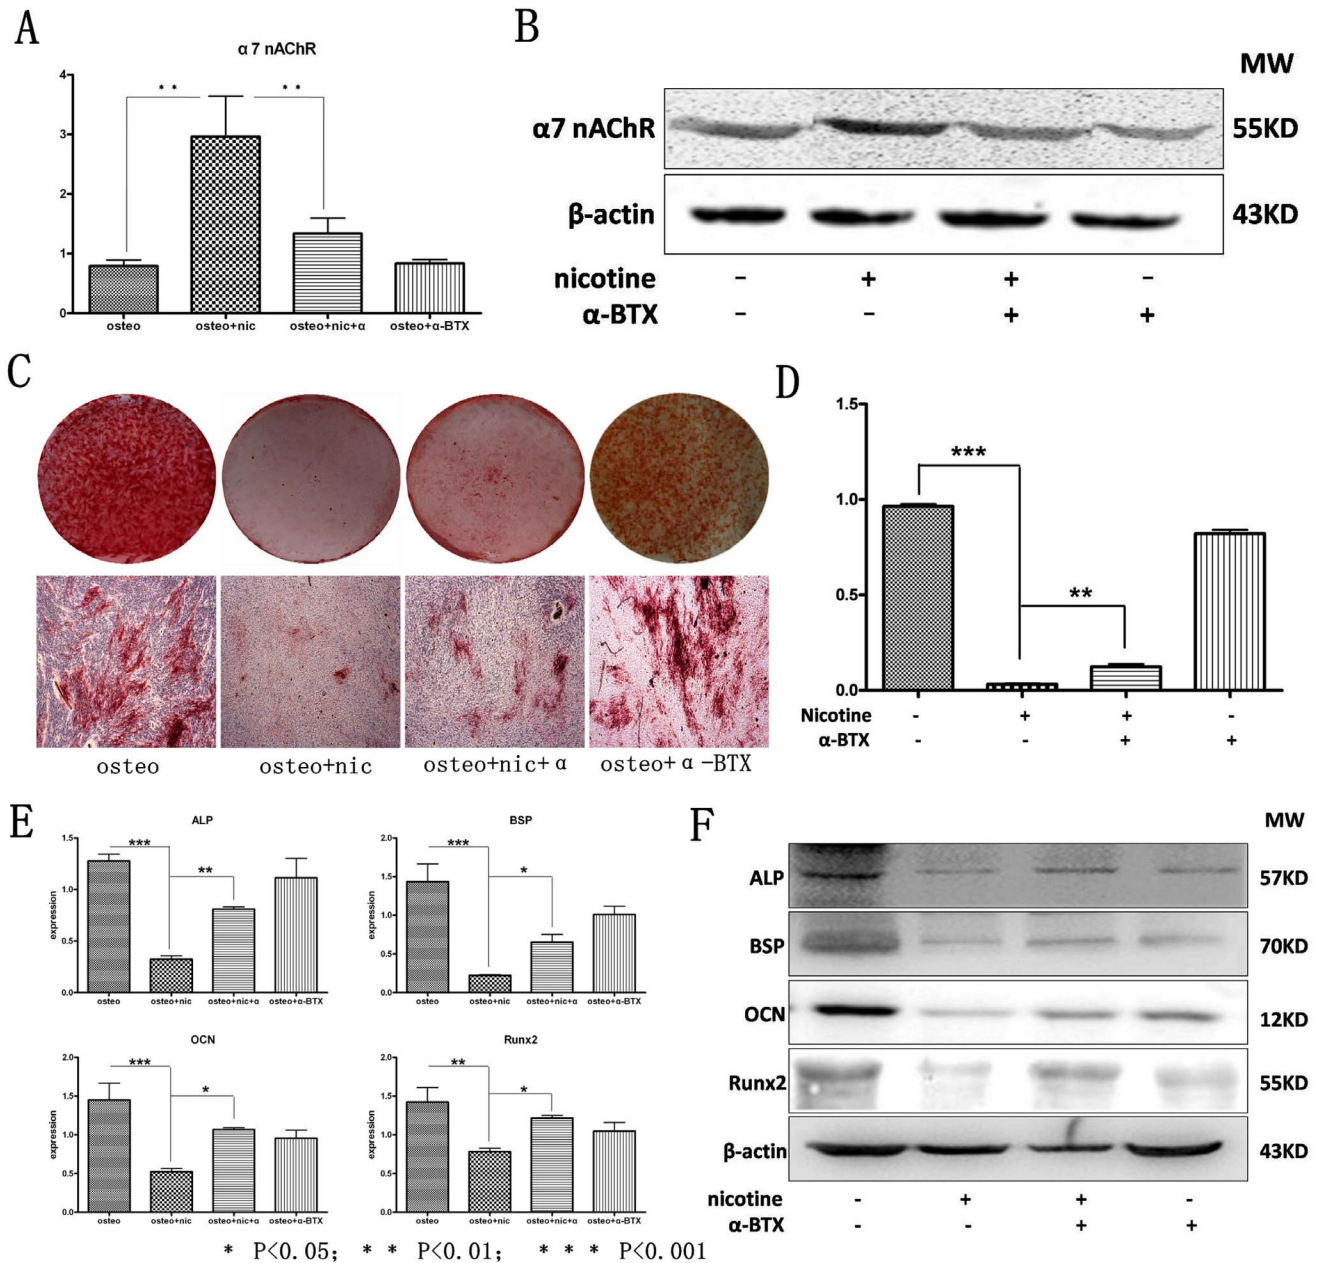

**Figure 4. Nicotine deteriorates the osteogenic differentiation of hPDLSCs through the activation of  $\alpha 7$  nAChR.** The expression of  $\alpha 7$  nAChR in PDLSCs from each group was detected by (A) qRT-PCR and (B) Western Blot analysis. C, D: hPDLSCs treated with/without nicotine and  $\alpha$ -BTX were cultured in osteogenic medium and osteogenic differentiation was determined by Alizarin red S staining after 21 days. E: The expression of osteogenic related genes Runx2, BSP, ALP and OCN were determined by qRT-PCR after 14 days of culturing with osteogenic supplement. F: The expression of osteogenic related protein Runx2, BSP, ALP and OCN were determined by western blot after 14 days of culturing with osteogenic supplement. Data represent the means  $\pm$  SD. \* $p$ <0.05 (n=3). doi:10.1371/journal.pone.0083102.g004

Results of Alizarin Red S staining (Figure 5B, C) revealed that the down regulating effect of nicotine toward the osteogenic differentiation of hPDLSCs was reversed when treated by dkk1 while dkk1 treatment alone had no effect in up regulating the osteogenic differentiation of hPDLSCs. Expression of osteogenic genes and proteins were in accordance with the histological staining. Nicotine suppressed the expression of ALP, OCN, BSP and Runx2 in gene and protein levels while this effect was partially reversed when dkk1 was added simultaneously with nicotine in the osteogenic induction medium. Results also indicated that dkk1

alone didn't enhance the expression of these genes and proteins (Figure 5D, E).

### Discussion

Every year, the number of people who die from cigarette smoking is about 5 million. It is no doubt that smoking is a risk factor for series systematic diseases such as tumor, respiratory diseases and cardiovascular diseases [24]. For periodontitis, smoking affects its development noted as more severe alveolar

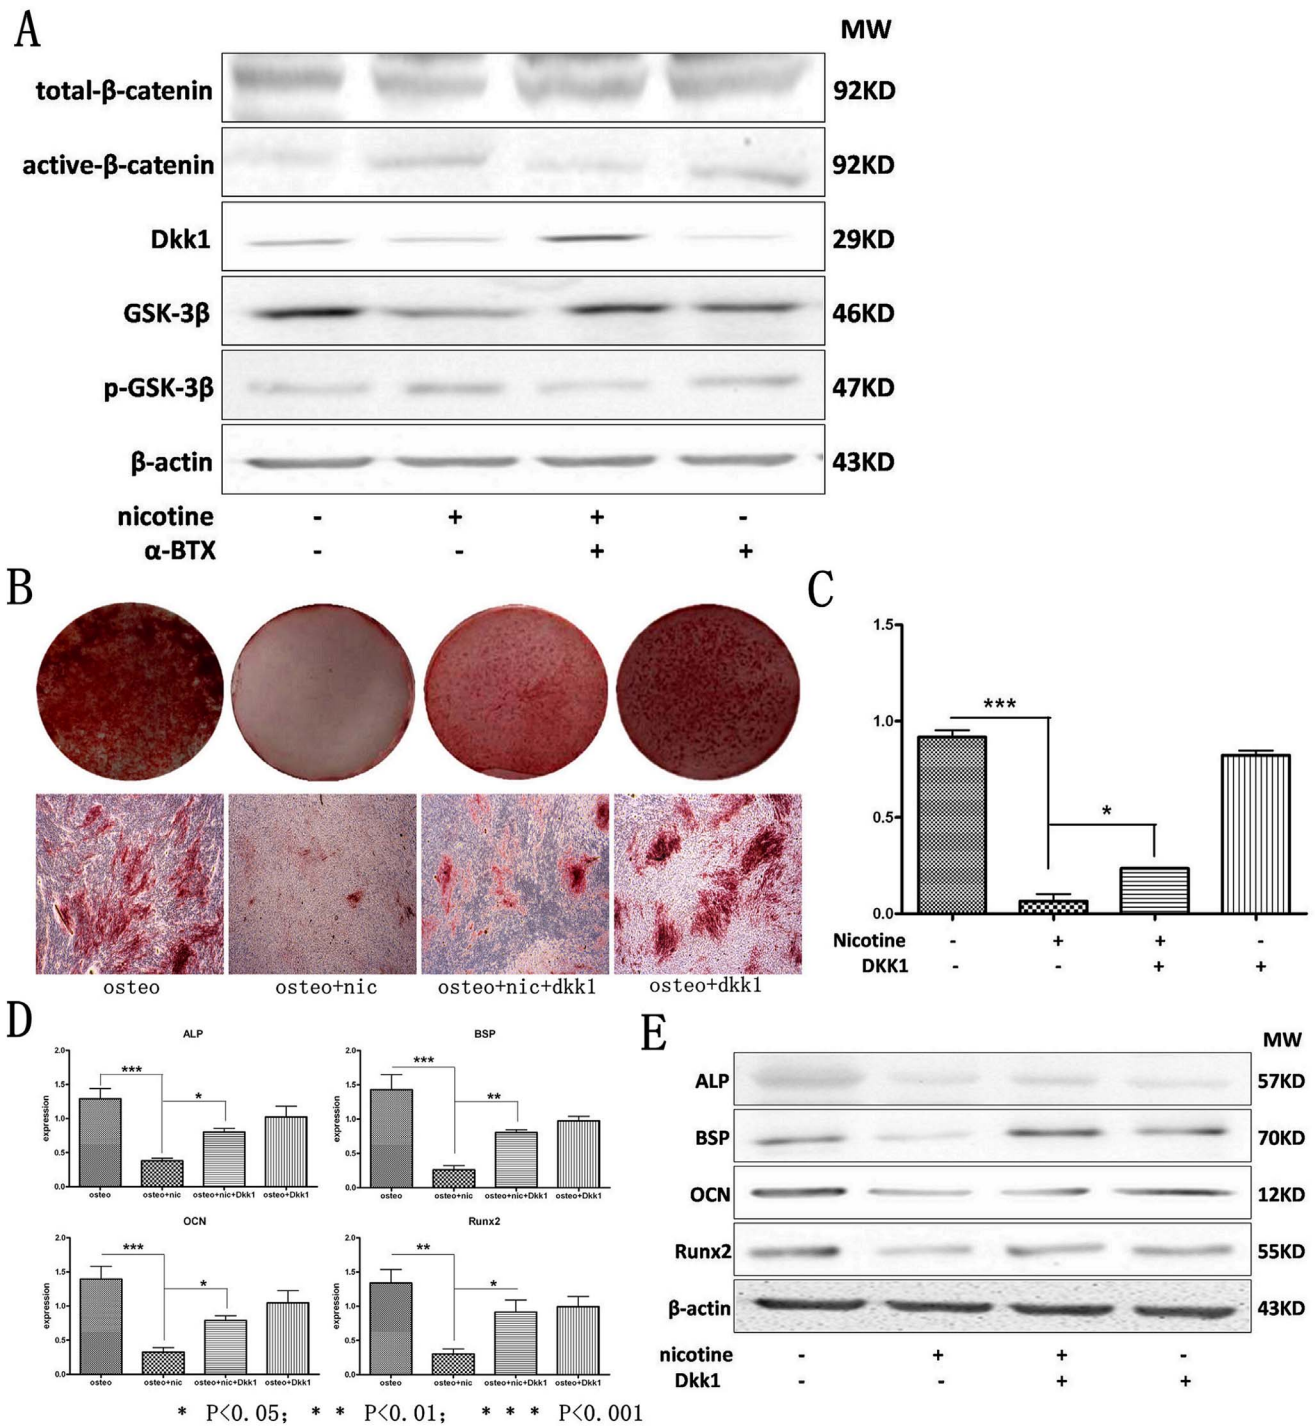

**Figure 5. Nicotine deteriorates the osteogenic differentiation of hPDLSCs through  $\alpha 7$  nAChR regulating Wnt/ $\beta$ -catenin pathway. A:** The expression of wnt signaling pathway related proteins were determined by western blot, wnt signaling pathway was activated by nicotine in the downstream of  $\alpha 7$  nAChR; **B, C:** hPDLSCs treated with/without nicotine and dkk1 were cultured in osteogenic medium and osteogenic differentiation was determined by Alizarin red S staining after 21 days. **D:** The expression of osteogenic related genes Runx2, BSP, ALP and OCN were determined by qRT-PCR after 14 days of culturing with osteogenic supplement. **E:** The expression of osteogenic related proteins Runx2, BSP, ALP and OCN were determined by western blot after 14 days of culturing with osteogenic supplement. Data represent the means  $\pm$  SD. \* $p$ <0.05 (n=3). doi:10.1371/journal.pone.0083102.g005

bone resorption, loss of periodontal attachment and deeper periodontal pockets [25]. Results of epidemiological investigations which were based on cross sectional studies indicated that prevalence of periodontitis for smokers was 2–7 times more than

non-smokers [26] and cigarette smoking played a negative role in teeth preserving for periodontitis patients [27,28]. Previous studies had already demonstrated that nicotine in cigarette could deteriorate the structure of periodontal fibroblast and further



impair the normal function of cells, thus making fibroblast lose their attachment to the root surface and finally leading to a worse recovery for periodontal tissues [9]. Not only the direct effect of inducing cell apoptosis, nicotine could also stimulate neutrophile granulocyte to express inflammatory related cytokine IL-8 in a time and dose dependent manner [29]. Makino et al [30] injected nicotine into abdominal subcutaneous of rats and used enzyme-linked immunosorbent assay to study the development of periodontitis in protein level. Results indicated higher expression of IL-6, IL-10 and IFN- $\gamma$  in periodontal tissues. However, studies at present mainly focus on the destructive effects of nicotine while few articles cover the field of detailed mechanism for nicotine's suppressive effect toward the regeneration of periodontal tissues. In current studies, we confirmed that nicotine with different concentrations could suppress the osteogenic potential of PDLSC in a concentration dependent characteristic. Nicotine suppressed PDLSC osteogenic differentiation through the activation of  $\alpha 7$  nAChR which might increase phosphorylation of GSK3 $\beta$  and lead to activation of wnt/ $\beta$ -catenin signaling pathway.

PDLSCs possess the basic characteristics of normal stem cells. *In vivo* study had already demonstrated that PDLSCs had the capability of forming cementoblast like cells and cementum/periodontal ligament like tissues [2]. Similar conclusions were also confirmed in mini-swine [31]. The other experiment affirmed that PDLSCs from mini-swine could be autografted and form root/periodontal ligament like complexes which could support artificial tooth root to perform like a natural one [32]. Besides the periodontal tissue regenerative potential for PDLSCs, they could also be used in the field of tooth regeneration by co-culturing with some other stem cells and precursor cells coated outside scaffold materials [33]. Results of Ma et al [34] revealed that PDLSCs co-cultured with cementoblast could accelerate their differentiation procedure in the environment of dentin non-collagenous protein induction, indicating the significant potential of PDLSCs in the field of tooth root regeneration. Taking these backgrounds into consideration, results of our study explained why smokers had an unsatisfactory periodontal regeneration and provided target for clinical treatment in the near future.

$\alpha 7$  nAChR plays a critical role in regulating the process of immunoregulation and inflammatory reaction in our body [35] through which its specific agonist nicotine increases the expression of Ach to perform the anti-inflammatory function [36]. What is more, nicotine could also bind to  $\alpha 7$  nAChR in immunological cells directly suppressing the expression of pro-inflammatory factors such as TNF- $\alpha$  and further regulate the NF- $\kappa$ B signaling pathway, thus influencing the process of inflammatory reaction [37]. It is concluded that  $\alpha 7$  nAChR signaling pathway is an important anti-inflammatory pathway in many organs and systems.

However, previous results of our research group indicated that  $\alpha 7$  nAChR also expressed in human periodontal ligament cells and nicotine could up regulate the expression of pro-inflammatory factor IL-1 $\beta$  through activating this receptor [9]. In animal experiments, Liu et al [38] found that nicotine deteriorated the alveolar bone loss of experimental periodontitis rats. Wang et al [9] further confirmed the mRNA and protein expression of  $\alpha 7$  nAChR in periodontal tissues in rats, besides that the receptor could also be found in epithelial cells and osteoclast cells in walls of periodontal pockets of periodontitis rats. What was more, its expression was up regulated by stimulation of nicotine. All these results indicated that unlike its effect in other organs and systems,  $\alpha 7$  nAChR might play a destructive role in the development of periodontitis. Our study further confirmed that after binding to  $\alpha 7$  nAChR, its specific agonist nicotine would affect the expression of osteogenic related genes and proteins of PDLSCs downstream,

indicating that  $\alpha 7$  nAChR expressed in PDLSCs took part in the down regulating procedure of nicotine toward the osteogenic potential of PDLSCs.

$\alpha$ -BTX, which is a specific antagonist of  $\alpha 7$  nAChR, could reverse the impairment of osteogenic differentiation of PDLSCs after nicotine treatment, further confirming our conclusion that it is  $\alpha 7$  nAChR through which nicotine deteriorates the osteogenic potential of PDLSCs. Based on the original assumption, with the stimulation of  $\alpha$ -BTX, the protein expression of osteogenic makers should not be changed. However, results showed the tendency that when  $\alpha$ -BTX was stimulated alone, the protein level of osteogenic makers decreased. We speculated that it is the toxicity of the chemical affected the protein expression of osteogenic makers during the long time procedure of osteogenic induction.

As described before,  $\alpha 7$  nAChR played an important role in regulating inflammatory reactions [35] and in PDLSCs, it is the up regulating expression of inflammatory factors through which the receptor mediating the destructive effect [9]. However, results of our research suggested that the activation of wnt signaling pathway after  $\alpha 7$  nAChR was bound with its specific agonist nicotine; osteogenic differentiation of PDLSC was suppressed and the suppressive effects mediated by this pathway could be reversed after inhibiting wnt pathway by dkk1. Our results indicated that  $\alpha 7$  nAChR might directly regulate wnt signaling pathway through regulating dkk1 and downstream GSK3 $\beta$  expression. However, the effect of inflammatory factors still need to be excluded in the future study.

Our research demonstrated that  $\alpha 7$  nAChR mediated the down regulating effect of nicotine toward the osteogenic potential of PDLSC and protein expression of wnt related transcriptional factors could be detected in the downstream of  $\alpha 7$  nAChR. With the stimulation of nicotine, wnt signaling pathway was activated and also took part in the negative regulation of nicotine toward the osteogenic potential of PDLSC. This result is coincident with the results of our previous studies which demonstrated that activating wnt pathway suppressed osteogenic differentiation of PDLSCs. However, more detailed mechanisms of wnt signaling pathway regulated by  $\alpha 7$  nAChR should be further studied. What is more, whether non-canonical wnt pathway plays a certain role in the regulating process should also be confirmed.

## Supporting Information

**Figure S1 Differences of osteogenic differentiation capacity for hPDLSCs from 9 donor teeth.** A: hPDLSCs from 9 donor teeth were cultured in osteogenic medium and osteogenic differentiation was determined by Alizarin red staining after 21 days. Representative entire plate views of 6-well plates for PDLSCs from each donor; B: The quantity result for Alizarin Red S staining, there is no significant differences among PDLSCs from 9 donors.  
(TIF)

**Figure S2 ALP staining of osteogenic differentiation of hPDLSC.** A: hPDLSCs treated by different dose of nicotine were cultured in osteogenic medium and osteogenic differentiation was determined by ALP staining after 7 days. Representative entire plate views of ALP staining in 6-well plates for PDLSCs from each group; B: hPDLSCs treated with/without nicotine and  $\alpha$ -BTX were cultured in osteogenic medium and osteogenic differentiation was determined by ALP staining after 7 days. C: hPDLSCs treated with/without nicotine and dkk1 were cultured in osteogenic medium and osteogenic differentiation was determined by ALP staining after 7 days.  
(TIF)

## Acknowledgments

The authors thank patients who were willing to give their teeth for participating in this research. And though listed in the author names, all the other authors still expressed their sincerest gratitude to Dr. Fengqing Shang for her hard work, sacrifice and contribution in revising this paper.

## References

- Armitage GC (2004) Periodontal diagnoses and classification of periodontal diseases. *Periodontol* 2000 34: 9–21.
- Seo BM, Miura M, Gronthos S, Bartold PM, Batouli S, et al. (2004) Investigation of multipotent postnatal stem cells from human periodontal ligament. *Lancet* 364: 149–155.
- Ivanovski S, Gronthos S, Shi S, Bartold PM (2006) Stem cells in the periodontal ligament. *Oral Dis* 12: 358–363.
- Calsina G, Ramon JM, Echeverria JJ (2002) Effects of smoking on periodontal tissues. *J Clin Periodontol* 29: 771–776.
- Bergstrom J (2004) Tobacco smoking and chronic destructive periodontal disease. *Odontology* 92: 1–8.
- Kashiwagi Y, Yanagita M, Kojima Y, Shimabukuro Y, Murakami S (2012) Nicotine up-regulates IL-8 expression in human gingival epithelial cells following stimulation with IL-1 $\beta$  or P. gingivalis lipopolysaccharide via nicotinic acetylcholine receptor signalling. *Arch Oral Biol* 57: 483–490.
- Artis D (2008) Epithelial-cell recognition of commensal bacteria and maintenance of immune homeostasis in the gut. *Nat Rev Immunol* 8: 411–420.
- Tanaka H, Tanabe N, Suzuki N, Shoji M, Torigoe H, et al. (2005) Nicotine affects mineralized nodule formation by the human osteosarcoma cell line Saos-2. *Life Sci* 77: 2273–2284.
- Wang XJ, Liu YF, Wang QY, Tsuruoka M, Ohta K, et al. (2010) Functional expression of alpha 7 nicotinic acetylcholine receptors in human periodontal ligament fibroblasts and rat periodontal tissues. *Cell Tissue Res* 340: 347–355.
- Grando SA, Kawashima K, Wessler I (2003) Introduction: the non-neuronal cholinergic system in humans. *Life Sci* 72: 2009–2012.
- Sakurai R, Cerny L, Torday J, Rehan V (2011) Mechanism for nicotine-induced up regulation of wnt signaling in human alveolar interstitial fibroblasts. *Exp Lung Res* 37: 144–154.
- Liu N, Shi S, Deng M, Tang L, Zhang G, et al. (2011) High levels of b-Catenin signaling reduce osteogenic differentiation of stem cells in inflammatory microenvironments through inhibition of the noncanonical wnt pathway. *Journal of Bone and Mineral Research* 26: 2082–2095.
- Chen X, Hu C, Wang G, Li L, Kong X, et al. (2013) Nuclear factor- $\kappa$ B modulates osteogenesis of periodontal ligament stem cells through competition with  $\beta$ -catenin signaling in inflammatory microenvironments. *Cell Death and Disease* 4: e510.
- Kong X, Liu Y, Ye R, Zhu B, Zhu Y, et al. (2013) GSK3 $\beta$  is a checkpoint for TNF- $\alpha$ -mediated impaired osteogenic differentiation of mesenchymal stem cells in inflammatory microenvironments. *Biochim Biophys Acta* 1830: 5119–5129.
- Yang Z, Jin F, Zhang X, Ma D, Han C, et al. (2009) Tissue engineering of cementum/periodontal-ligament complex using a novel three-dimensional pellet cultivation system for human periodontal ligament stem cells. *Tissue Eng Part C Methods* 15: 571–581.
- Liu Y, Liu W, Hu C, Xue Z, Wang G, et al. (2011) MiR-17 modulates osteogenic differentiation through a coherent feed-forward loop in mesenchymal stem cells isolated from periodontal ligaments of patients with periodontitis. *Stem Cells* 29: 1804–1816.
- Wang L, Shen H, Zheng W, Tang L, Yang Z, et al. (2011) Characterization of stem cells from alveolar periodontal ligament. *Tissue Eng Part A* 17: 1015–1026.
- Zhang J, An Y, Gao LN, Zhang YJ, Jin Y, et al. (2012) The effect of aging on the pluripotential capacity and regenerative potential of human periodontal ligament stem cells. *Biomaterials* 33: 6974–6986.
- Chen SC, Marino V, Gronthos S, Bartold PM (2006) Location of putative stem cells in human periodontal ligament. *J Periodontol Res* 41: 547–553.
- Gronthos S, Mrozik K, Shi S, Bartold PM (2006) Ovine periodontal ligament stem cells: isolation, characterization, and differentiation potential. *Calcif Tissue Int* 79: 310–317.
- Wada N, Menicanin D, Shi S, Bartold PM, Gronthos S (2009) Immunomodulatory properties of human periodontal ligament stem cells. *J Cell Physiol* 219: 667–676.
- Li B, Qu C, Chen C, Liu Y, Akiyama K, et al. (2012) Basic fibroblast growth factor inhibits osteogenic differentiation of stem cells from human exfoliated deciduous teeth through ERK signaling. *Oral Dis* 18: 285–292.
- Liu C, Li Y, Semenov M, Han C, Baeg GH, et al. (2008) Control of beta-catenin phosphorylation/degradation by a dual kinase mechanism. *Cell* 108: 837–847.
- World Health Organization (2005) Governments celebrate five years of anti-tobacco convention. Available: <http://www.who.int/fctc/press.pdf>. Accessed 2013 Jun 12.
- Luzzi LI, Greggi SL, Passanezi E, Santana AC, Lauris JR, et al. (2007) Evaluation of clinical periodontal conditions in smokers and non-smokers. *J Appl Oral Sci* 15: 512–517.
- Tomar SL, Asma S (2000) Smoking-attributable Periodontitis in the United States: findings from NHANES III. National Health and Nutrition Examination Survey. *J Periodontol* 71: 743–751.
- Chambrone L, Chambrone D, Lima LA (2010) Predictors of tooth loss during long-term periodontal maintenance: a systematic review of observational studies. *J Clin Periodontol* 37: 675–684.
- Wan CP, Leung WK, Wong MC, Wong RM, Wan P, et al. (2009) Effects of smoking on healing response to non-surgical periodontal therapy: a multilevel modeling analysis. *J Clin Periodontol* 36: 229–239.
- Iho S, Tanaka Y, Takaiji R, Kobayashi C, Muramatsu I, et al. (2003) Nicotine induces human neutrophils to produce IL-8 through the generation of peroxynitrite and subsequent activation of NF- $\kappa$ B. *J Leukoc Biol* 74: 942–951.
- Makino A, Yamada S, Okuda K, Kato T (2008) Nicotine involved in periodontal disease through influence on cytokine levels. *FEMS Immunol Med Microbiol* 52: 282–286.
- Liu Y, Zheng Y, Ding G, Fang D, Zhang C, et al. (2008) Periodontal ligament stem cell mediated treatment for periodontitis in Miniature Swine. *Stem Cells* 26: 1065–1073.
- Sonoyama W, Liu Y, Fang D, Yamaza T, Seo BM, et al. (2006) Mesenchymal stem cell mediated functional tooth regeneration in Swine. *PLoS One* 20(1): e79.
- Zhang W, Abukawa H, Troulis MJ, Kaban LB, Vacanti JP, et al. (2009) Tissue engineered hybrid tooth-bone constructs. *Methods* 47(2): 122–128.
- Ma Z, Li S, Song Y, Tang L, Ma D, et al. (2008) The biological effect of dentin noncollagenous proteins (DNCPs) on the human periodontal ligament stem cells (HPDLSCs) in vitro and in vivo. *Tissue Eng Part A* 14: 2059–2068.
- Hamano R, Takahashi HK, Iwagaki H, Yoshino T, Nishibori M, et al. (2006) Stimulation of alpha7 nicotinic acetylcholine receptor inhibits CD14 and the toll-like receptor 4 expression in human monocytes. *Shock* 26: 358–364.
- Tracey KJ (2007) Physiology and immunology of the cholinergic anti-inflammatory pathway. *J Clin Invest* 117: 289–296.
- Yoshikawa H, Kurokawa M, Ozaki N, Nara K, Atou K, et al. (2006) Nicotine inhibits the production of proinflammatory mediators in human monocytes by suppression of I- $\kappa$ B phosphorylation and nuclear factor- $\kappa$ B transcriptional activity through nicotinic acetylcholine receptor alpha 7. *Clin Exp Immunol* 146: 116–123.
- Liu YF, Wu LA, Wang J, Wen LY, Wang XJ (2010) Micro-computerized tomography analysis of alveolar bone loss in ligature- and nicotine-induced experimental periodontitis in rats. *J Periodontol Res* 45: 714–719.

## Author Contributions

Conceived and designed the experiments: ZZ BL XW YJ. Performed the experiments: ZZ ZD FL YZ. Analyzed the data: ZZ YY FS. Contributed reagents/materials/analysis tools: LW. Wrote the paper: ZZ BL XW.
